# Supplementary material
Source: PubMed Central journal article supplement (PMC4249235)

**Table S1. Bacterial strains and plasmids.**

| Bacterial strain or plasmid          | Relevant characteristics*                                                                                                          | Reference or source           |
|--------------------------------------|------------------------------------------------------------------------------------------------------------------------------------|-------------------------------|
| <i>C. botulinum</i> strains          |                                                                                                                                    |                               |
| ATCC 3502                            | Isolated in 1940, producing type A1 neurotoxin                                                                                     | Sebaihia <i>et al.</i> (2007) |
| <i>codY</i> mutant                   | ATCC 3502 derivative, <i>codY</i> inserted with the LI.LtrB-derived intron at the antisense site of 526 bp                         | This study                    |
| WT-pMTL82151                         | <i>C. botulinum</i> ATCC 3502 strain carrying plasmid pMTL82151                                                                    | This study                    |
| <i>codY</i> -pMTL82151               | <i>codY</i> mutant carrying plasmid pMTL82151                                                                                      | This study                    |
| WT-pMTL82151:: <i>codY</i>           | <i>C. botulinum</i> ATCC 3502 strain carrying plasmid pMTL82151:: <i>codY</i>                                                      | This study                    |
| <i>codY</i> -pMTL82151:: <i>codY</i> | <i>codY</i> mutant carrying plasmid pMTL82151:: <i>codY</i>                                                                        | This study                    |
| <i>E. coli</i> strains               |                                                                                                                                    |                               |
| CA434                                | <i>E. coli</i> HB101 carrying the Inc $\beta$ conjugative plasmid R702                                                             | Purdy <i>et al.</i> (2002)    |
| CA434-pMTL82151                      | <i>E. coli</i> CA434 carrying plasmid pMTL82151                                                                                    | This study                    |
| CA434-pMTL82151:: <i>codY</i>        | <i>E. coli</i> CA434 carrying plasmid pMTL82151:: <i>codY</i>                                                                      | This study                    |
| NEB 5-alpha strain                   | cloning strain, DH5 $\alpha$ <sup>TM</sup> derivative                                                                              | NEB                           |
| NEB 5-alpha-pBAD30:: <i>codY</i>     | NEB 5-alpha carrying plasmid pBAD30:: <i>codY</i>                                                                                  | This study                    |
| LMG 194                              | F <sup>-</sup> $\Delta$ <i>lacX74 galE galk thi rpsL<math>\Delta</math><i>phoA (PvuII) <math>\Delta</math>ara714 leu::Tn10</i></i> | Life Technologies             |
| LMG 194-pBAD30:: <i>codY</i>         | LMG 194 carrying plasmid pBAD30:: <i>codY</i>                                                                                      | This study                    |
| Plasmid                              |                                                                                                                                    |                               |
| pMTL007C-E2                          | Inducible clostridial expression vector for expression of Clostron, containing Erm RAM, Cole1, pCB102, Cm <sup>R</sup>             | Heap <i>et al.</i> (2010)     |
| pMTL007C-E2:: <i>codY</i>            | pMTL007C-E2 containing intron retargeted to <i>codY</i> (antisense insertion at 526 bp)                                            | This study; DNA 2.0           |
| pMTL82151                            | <i>Clostridium-E.coli</i> shuttle plasmid; pBP1 replicon; Cm <sup>R</sup>                                                          | Heap <i>et al.</i> (2009)     |

|                         |                                                                                                                    |                       |
|-------------------------|--------------------------------------------------------------------------------------------------------------------|-----------------------|
| pMTL82151:: <i>codY</i> | pMTL82151 containing the DNA fragment amplified by PCR using primers <i>codY</i> -82151-F and <i>codY</i> -82151-R | This study            |
| pBAD30                  | expression vector; <i>araBAD</i> promoter; Amp <sup>R</sup>                                                        | Gift from Bruno Dupuy |
| pBAD30:: <i>codY</i>    | pBAD30 containing the DNA fragment amplified by PCR using primers <i>codY</i> -30-F and <i>codY</i> -30-R          | This study            |

\* Amp<sup>R</sup>, ampicillin resistance; Cm<sup>R</sup>, chloramphenicol/ thiamphenicol resistance

## References

- Heap, J.T., Pennington, O.J., Cartman, S.T., and Minton, N.P. (2009) A modular system for *Clostridium* shuttle plasmids. *J Microbiol Methods* **78**: 79-85.
- Heap, J.T., Kuehne, S.A., Ehsaan, M., Cartman, S.T., Cooksley, C.M., Scott, J.C., and Minton, N.P. (2010) The ClosTron: Mutagenesis in *Clostridium* refined and streamlined. *J Microbiol Methods* **80**: 49-55.
- Purdy, D., O'Keeffe, T.A., Elmore, M., Herbert, M., McLeod, A., Bokori-Brown, M., *et al.* (2002) Conjugative transfer of clostridial shuttle vectors from *Escherichia coli* to *Clostridium difficile* through circumvention of the restriction barrier. *Mol Microbiol* **46**: 439-452.
- Sebahia, M., Peck, M.W., Minton, N.P., Thomson, N.R., Holden, M.T., Mitchell, W.J., *et al.* (2007) Genome sequence of a proteolytic (Group I) *Clostridium botulinum* strain Hall A and comparative analysis of the clostridial genomes. *Genome Res* **17**: 1082-1092.

**Table S2. Oligonucleotides.**

| Primer                                    | Sequence(5'-3')*                                                                        |
|-------------------------------------------|-----------------------------------------------------------------------------------------|
| <b>PCR screening</b>                      |                                                                                         |
| <i>codY</i> -F                            | TTGAATGTGACGAAGTAAGG                                                                    |
| <i>codY</i> -R                            | TTCTGTGCCATCTAACTCAT                                                                    |
| <b>Complementation and overexpression</b> |                                                                                         |
| <i>codY</i> -82151-F                      | NNNNNNGCGGCCGCGTGAAGAATGTGGAAGTTAC                                                      |
| <i>codY</i> -82151-R                      | NNNNNNGCTAGCCTCCTTAGGTAGTATATCACAC                                                      |
| <b>qRT-PCR</b>                            |                                                                                         |
| <i>botA</i> -F                            | CGCGAAATGGTTATGGCTCT                                                                    |
| <i>botA</i> -R                            | GCCTGCACCTAAAAGAGGATTT                                                                  |
| 16 <i>Srrn</i> -F                         | AGCGGTGAAATGCGTAGAGA                                                                    |
| 16 <i>Srrn</i> -R                         | GGCACAGGGGGAGTTGATAC                                                                    |
| <b>Protein expression</b>                 |                                                                                         |
| <i>codY</i> -30-F                         | NNNNNNGAATTCAGGAGGAATTAACCATGGGGGGTTCT <b>CATCATCATCATCAT</b> GGTAT<br>GAGTTCATTAAGATAA |
| <i>codY</i> -30-R                         | NNNNNNGCATGCCTATTTTATCTTCTTTAATTCTTCTAAA                                                |
| <b>EMSA</b>                               |                                                                                         |
| <i>Pntnh-botA</i> -F                      | IRD700-GGCTTTAGAGAGATTAGAACCCATA                                                        |
| <i>Pntnh-botA</i> -R                      | IRD700-CATTTTTATTATCTACCGGGGAA                                                          |

\*, Restriction enzyme site is indicated by underline. Sequence encoding the 6×His tag is marked in bold.

**Fig. S1. Growth curves of *Clostridium botulinum* ATCC 3502 wild-type strain and *codY* mutant.** Growth of WT and the *codY* mutant in tryptose-peptone-glucose-yeast extract medium. Error bars indicate standard deviations of three biological replicates.

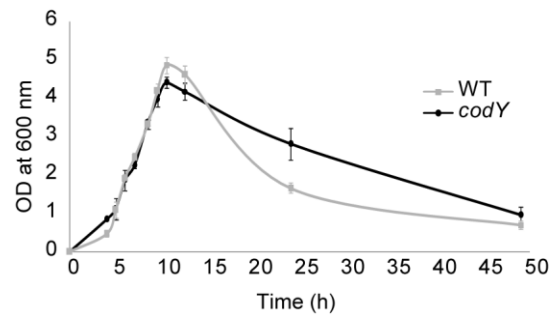

**Fig. S2. Growth curves of the complementation and overexpression strains.** Growth of the complementation strain *codY*-pMTL82151::*codY*, overexpression strain WT-pMTL82151::*codY*, and vector control strains WT-pMTL82151 and *codY*-pMTL82151 in tryptose-peptone-glucose-yeast extract medium. Error bars indicate standard deviations of three biological replicates.

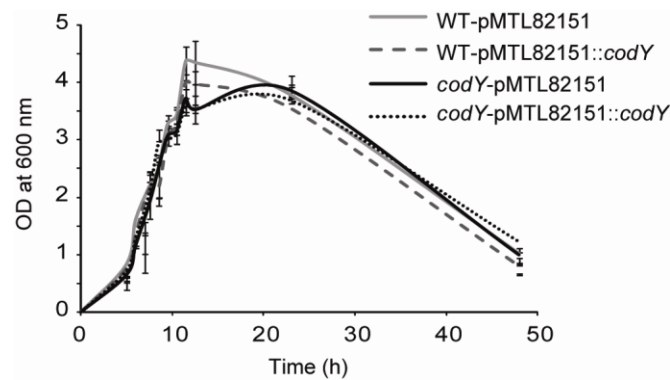

Supplement: AEM.02838-14_zam999105855so1.pdf [file AEM.02838-14_zam999105855so1.pdf]
